# Supplementary material
Source: publisher site journal article supplement (https://www.dovepress.com/article/224943)
Supplement: Supplementary file 1 [file get_supplementary_file.php]

# Appendices

Appendix 1: R code for PCA

## packages ## Use install.packages() to install. Example: install.packages("haven")

library(FactoMineR)

library(factoextra)

library(psych)

library(haven)

library(dplyr)

## Load data ## Using haven package. Might need to change work directory to folder of SPSS file by puttin in the path in setwd(). Example: setwd("F:/git/surname")

COPD_SM = read_sav("TASMAN - updated.sav")

head(COPD_SM)

## Pre-process ## Relevant variables only using dplyr

GSES <- COPD_SM %>% select(GSES_1:GSES_10)

UPCC <- COPD_SM %>% select(UPCC_1:UPCC_21)

head(GSES)

head(UPCC)

# listwise deletion similar to SPSS (FactoMineR mean imputates as default (not recommended))

GSES1 <-GSES[complete.cases(GSES), ]

head(GSES1)

UPCC1 <-UPCC[complete.cases(UPCC), ]

head(UPCC1)

## Run PCA ## Using FactoMineR

GSES_pca <- PCA(GSES1)

UPCC_pca <- PCA(UPCC1)

## Scree plot ## Using factoextra

fviz_screeplot(GSES_pca, ncp=5)

fviz_screeplot(UPCC_pca, ncp=5)

#Answer: GSES shows 1 components

#Answer: UPCC shows 1 components

## Kaiser-Guttman ##

GSES_pca$eig

UPCC_pca$eig

# Alternatives: summary(GSES_pca), get_eigenvalue(GSES_pca)

#Answer: GSES 1 Eigenvalues > 1

#Answer: UPCC 4 Eigenvalues > 1

## Parallel analysis ## Using psych package

GSES_fa_parallel <- fa.parallel(GSES1)

GSES_fa_parallel

UPCC_fa_parallel <- fa.parallel(UPCC1)

UPCC_fa_parallel

#Answer: GSES Parallel analysis suggests 1 components

#Answer: UPCC Parallel analysis suggests 1 components

## Relevant questions ##

# Create a barplot for the variables with the highest contributions to the 1st PC.

fviz_contrib(GSES_pca, choice = "var", axes = 1, top = 10)

# Create a barplot for the variables with the highest contributions to the 1st PC.

fviz_contrib(UPCC_pca, choice = "var", axes = 1, top = 10)

## RANDOM ##

#summary(GSES_pca)

#GSES_pca$ind$coord

#sweep(GSES_pca$var$coord,2,sqrt(GSES_pca$eig[1:ncol(GSES_pca$var$coord),1]),FUN="/")

#0.3086547 * sqrt(5.6809172

Appendix 2: PCA & Scree plot

GSES

| Total Variance Explained | | | | | | |
| --- | --- | --- | --- | --- | --- | --- |
| Component | Initial Eigenvalues | | | Extraction Sums of Squared Loadings | | |
| Total | % of Variance | Cumulative % | Total | % of Variance | Cumulative % |
| 1 | 5.681 | 56.809 | 56.809 | 5.681 | 56.809 | 56.809 |
| 2 | 0.952 | 9.524 | 66.333 |  |  |  |
| 3 | 0.762 | 7.622 | 73.955 |  |  |  |
| 4 | 0.525 | 5.251 | 79.206 |  |  |  |
| 5 | 0.502 | 5.021 | 84.227 |  |  |  |
| 6 | 0.378 | 3.775 | 88.002 |  |  |  |
| 7 | 0.361 | 3.608 | 91.61 |  |  |  |
| 8 | 0.349 | 3.495 | 95.105 |  |  |  |
| 9 | 0.286 | 2.865 | 97.97 |  |  |  |
| 10 | 0.203 | 2.03 | 100 |  |  |  |

| Component Matrix | |
| --- | --- |
|  | Component |
| 1 |
| GSES_1 | **0.736** |
| GSES_2 | 0.59 |
| GSES_3 | **0.739** |
| GSES_4 | **0.773** |
| GSES_5 | **0.802** |
| GSES_6 | **0.803** |
| GSES_7 | **0.776** |
| GSES_8 | **0.742** |
| GSES_9 | **0.789** |
| GSES_10 | **0.766** |
| Extraction Method: Principal Component Analysis. | |
| a. 1 components extracted. | |

UPCC

| Total Variance Explained | | | | | | |
| --- | --- | --- | --- | --- | --- | --- |
| Component | Initial Eigenvalues | | | Extraction Sums of Squared Loadings | | |
| Total | % of Variance | Cumulative % | Total | % of Variance | Cumulative % |
| 1 | 9.293 | 44.251 | 44.251 | 9.293 | 44.251 | 44.251 |
| 2 | 1.743 | 8.298 | 52.55 | 1.743 | 8.298 | 52.55 |
| 3 | 1.457 | 6.937 | 59.486 | 1.457 | 6.937 | 59.486 |
| 4 | 1.048 | 4.992 | 64.478 | 1.048 | 4.992 | 64.478 |
| 5 | 0.93 | 4.427 | 68.905 |  |  |  |
| 6 | 0.844 | 4.018 | 72.923 |  |  |  |
| 7 | 0.719 | 3.421 | 76.345 |  |  |  |
| 8 | 0.652 | 3.104 | 79.449 |  |  |  |
| 9 | 0.626 | 2.981 | 82.43 |  |  |  |
| 10 | 0.568 | 2.705 | 85.136 |  |  |  |
| 11 | 0.554 | 2.638 | 87.773 |  |  |  |
| 12 | 0.502 | 2.388 | 90.161 |  |  |  |
| 13 | 0.377 | 1.797 | 91.958 |  |  |  |
| 14 | 0.319 | 1.521 | 93.479 |  |  |  |
| 15 | 0.294 | 1.4 | 94.879 |  |  |  |
| 16 | 0.245 | 1.166 | 96.045 |  |  |  |
| 17 | 0.225 | 1.072 | 97.117 |  |  |  |
| 18 | 0.202 | 0.962 | 98.079 |  |  |  |
| 19 | 0.168 | 0.801 | 98.88 |  |  |  |
| 20 | 0.139 | 0.661 | 99.541 |  |  |  |
| 21 | 0.096 | 0.459 | 100 |  |  |  |
| Extraction Method: Principal Component Analysis. | | | | | | |

| Component Matrix | | | | |
| --- | --- | --- | --- | --- |
|  | Component | | | |
| 1 | 2 | 3 | 4 |
| UPCC_1 | 0.601 | 0.538 | 0.229 | 0.129 |
| UPCC_2 | 0.588 | 0.489 | 0.242 | 0.153 |
| UPCC_3 | 0.698 | 0.399 | -0.147 | -0.292 |
| UPCC_4 | 0.652 | 0.22 | 0.05 | 0.045 |
| UPCC_5 | **0.717** | 0.39 | 0.049 | 0.188 |
| UPCC_6 | **0.735** | 0.133 | -0.242 | 0.134 |
| UPCC_7 | 0.542 | -0.062 | -0.513 | 0.197 |
| UPCC_8 | **0.738** | -0.194 | -0.21 | 0.082 |
| UPCC_9 | **0.791** | -0.083 | -0.303 | -0.124 |
| UPCC_10 | 0.676 | -0.112 | -0.172 | 0.105 |
| UPCC_11 | 0.561 | -0.109 | 0.286 | -0.579 |
| UPCC_12 | **0.821** | 0.096 | -0.103 | -0.061 |
| UPCC_13 | 0.689 | 0.218 | -0.151 | -0.131 |
| UPCC_14 | 0.631 | -0.166 | -0.194 | 0.043 |
| UPCC_15 | 0.584 | -0.462 | -0.05 | 0.227 |
| UPCC_16 | 0.601 | -0.029 | 0.082 | -0.53 |
| UPCC_17 | **0.804** | -0.224 | -0.033 | 0.07 |
| UPCC_18 | 0.694 | -0.312 | 0.409 | 0.006 |
| UPCC_19 | 0.695 | -0.314 | 0.388 | 0.142 |
| UPCC_20 | 0.658 | -0.446 | 0.247 | 0.021 |
| UPCC_21 | 0.301 | 0.141 | 0.539 | 0.283 |
| Extraction Method: Principal Component Analysis. | | | | |
| a. 4 components extracted. | | | | |

| Total Variance Explained | | | | | | |
| --- | --- | --- | --- | --- | --- | --- |
| Component | Initial Eigenvalues | | | Extraction Sums of Squared Loadings | | |
| Total | % of Variance | Cumulative % | Total | % of Variance | Cumulative % |
| 1 | 3.899 | 64.987 | 64.987 | 3.899 | 64.987 | 64.987 |
| 2 | 0.682 | 11.365 | 76.353 |  |  |  |
| 3 | 0.464 | 7.726 | 84.079 |  |  |  |
| 4 | 0.392 | 6.525 | 90.604 |  |  |  |
| 5 | 0.321 | 5.343 | 95.948 |  |  |  |
| 6 | 0.243 | 4.052 | 100 |  |  |  |
| Extraction Method: Principal Component Analysis. | | | | | | |

SMAS

| **Total Variance Explained** | | | | | | |
| --- | --- | --- | --- | --- | --- | --- |
| Component | Initial Eigenvalues | | | Extraction Sums of Squared Loadings | | |
| Total | % of Variance | Cumulative % | Total | % of Variance | Cumulative % |
| 1 | 9.556 | 31.855 | 31.855 | 9.556 | 31.855 | 31.855 |
| 2 | 2.893 | 9.642 | 41.497 | 2.893 | 9.642 | 41.497 |
| 3 | 2.154 | 7.181 | 48.678 | 2.154 | 7.181 | 48.678 |
| 4 | 1.850 | 6.166 | 54.844 | 1.850 | 6.166 | 54.844 |
| 5 | 1.444 | 4.813 | 59.657 | 1.444 | 4.813 | 59.657 |
| 6 | 1.229 | 4.097 | 63.754 | 1.229 | 4.097 | 63.754 |
| 7 | 1.139 | 3.796 | 67.550 | 1.139 | 3.796 | 67.550 |
| 8 | 1.094 | 3.647 | 71.197 | 1.094 | 3.647 | 71.197 |
| Extraction Method: Principal Component Analysis. | | | | | | |

| **Component Score Covariance Matrix** | | | | | | | | |
| --- | --- | --- | --- | --- | --- | --- | --- | --- |
| Component | 1 | 2 | 3 | 4 | 5 | 6 | 7 | 8 |
| 1 | 1.000 | .000 | .000 | .000 | .000 | .000 | .000 | .000 |
| Extraction Method: Principal Component Analysis. | | | | | | | | |


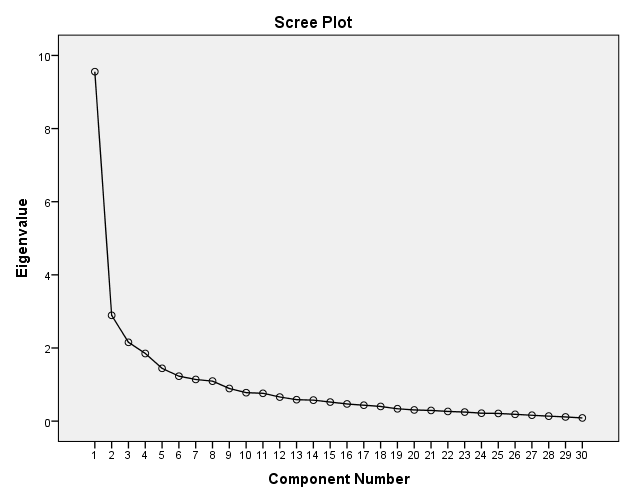


Appendix 3: Correlation between TASMAN total score, SMAS, GSES, UPCC and IPQ concerns

|  |  | TASMAN_totalscore | SMAS totaal |
| --- | --- | --- | --- |
| TASMAN_totalscore | Pearson Correlation | 1 | .320** |
| Sig. (2-tailed) |  | 0.002 |
| N | 91 | 89 |
| SMAS totaal | Pearson Correlation | .320** | 1 |
| Sig. (2-tailed) | 0.002 |  |
| N | 89 | 98 |
| GSES | Pearson Correlation | .904** | .292** |
| Sig. (2-tailed) | 0.000 | 0.004 |
| N | 91 | 98 |
| UPCC | Pearson Correlation | .821** | .397** |
| Sig. (2-tailed) | 0.000 | 0.000 |
| N | 91 | 97 |
| IPQ-K concern | Pearson Correlation | -0.098 | -.224* |
| Sig. (2-tailed) | 0.360 | 0.035 |
|  | N | 91 | 94 |

Appendix 4: Original TASMAN questionnaire, including original IPQ-concern response scale

| To which extent do you have the following capacities? | | Not competent | | | Barely competent | | | Competent | | | Very competent | | | |
| --- | --- | --- | --- | --- | --- | --- | --- | --- | --- | --- | --- | --- | --- | --- |
| 1 | See my own possibilities and opportunities | 1 | | | 2 | | | 3 | | | 4 | | | |
| 2 | See my own limitations. | 1 | | | 2 | | | 3 | | | 4 | | | |
| 3 | Clearly formulate what I want to achieve. | 1 | | | 2 | | | 3 | | | 4 | | | |
| 4 | To translate my desires to plans | 1 | | | 2 | | | 3 | | | 4 | | | |
| 5 | To find solutions | 1 | | | 2 | | | 3 | | | 4 | | | |
| 6 | Check if I have achieved what I want to achieve. | 1 | | | 2 | | | 3 | | | 4 | | | |
|  | | Not at all true | | | Hardly true | | | Moderately true | | | Exactly true | | | |
| 7 | I can always manage to solve difficult problems if I try hard enough. | 1 | | | 2 | | | 3 | | | 4 | | | |
| 8 | It is easy for me to stick to my aims and accomplish my goals. | 1 | | | 2 | | | 3 | | | 4 | | | |
| 9 | I am confident that I could deal efficiently with unexpected events. | 1 | | | 2 | | | 3 | | | 4 | | | |
| 10 | Thanks to my resourcefulness, I know how to handle unforeseen situations. | 1 | | | 2 | | | 3 | | | 4 | | | |
| 11 | I can solve most problems if I invest the necessary effort. | 1 | | | 2 | | | 3 | | | 4 | | | |
| 12 | I can remain calm when facing difficulties because I can rely on my coping abilities. | 1 | | | 2 | | | 3 | | | 4 | | | |
| 13 | When I am confronted with a problem, I can usually find several solutions. | 1 | | | 2 | | | 3 | | | 4 | | | |
| 14 | If I am in trouble, I can usually think of a solution | 1 | | | 2 | | | 3 | | | 4 | | | |
| 15 | I can usually handle whatever  comes my way | 1 | | | 2 | | | 3 | | | 4 | | | |
| 16 | How concerned are you about your illness? | 0 | 1 | 2 | 3 | 4 | 5 | | 6 | 7 | | 8 | 9 | 10 |
|  |  | *Not at all concerned* | | |  | | | | | | *Extremely concerned* | | | |
